# Supplementary material
Source: publisher figshare collection journal article supplement (https://tandf.figshare.com/ndownloader/files/14079815)
Supplement: Supplementary file 1 [file 14079815]

## SUPPLEMENTARY MATERIAL

### Volatiles composition and antioxidant activity *Inula oculus-christi* L. from Serbia

Violeta D. Mitić <sup>a\*</sup>, Marija D. Ilić <sup>a</sup>, Vesna P. StankovJovanović <sup>a</sup>, Aleksandra S. Djordjevic <sup>a</sup>, Marija S. Marković <sup>b</sup> and Gordana S. Stojanović <sup>a</sup>

<sup>a</sup> *Department of Chemistry, Faculty of Science and Mathematics University of Niš, Višegradska 33, 18000 Niš, Serbia*

<sup>b</sup> *Department of Biology, and Ecology, Faculty of Science and Mathematics University of Niš, Višegradska 33, 18000 Niš, Serbia*

The chemical composition of the essential oil and the volatiles obtained by static headspace (HS) of *Inula oculus-christi* L. is presented. The GC-MS analysis of the hydrodistilled oil resulted in the identification of 90 components, representing 92.7% of the oil. The most abundant compounds were: caryophyllene oxide (9.8%), *trans*-longipinocarveol (9.2%), eucalyptol (7.3%) and intermedeol (6.2%). The major constituent of *I. oculus-christi* L. HS volatiles was eucalyptol (87.4 %). The antioxidant activity was evaluated by four different methods: 2,2-diphenyl-1-picryl-hydrazylhydrate free radical assay (DPPH), 2,2-azino-bis-3-ethylbenzothiazoline-6-sulfonic acid (ABTS) method, total reducing power (TRP), ferric reducing antioxidant power (FRAP), and cupric reducing antioxidant capacity (CUPRAC). Total phenolic content in (TPC) examined oil was 177.95 µg GAE/mg oil. Radical scavenging potential of the oil was promising RSC-DPPH was 57.4% and RSC-ABTS was 82.7%.

**Keywords:** *Inula oculus-christi* L., essential oil, headspace volatiles, chemical composition; GC-MS, antioxidant activity

**Plant material and sample preparation:** The plant material of collected species *Inula oculus-christi* L. was identified according to Gajić (1975). The samples of plant *Inula oculus-christi* L. were collected at full blooming state on the dry grasslands places of the village Kravlje near Nis city, Serbia. A voucher specimen (13225) was deposited in the “Herbarium collection of the Faculty of Science and Mathematics, University of Niš“. The air-dried aerial parts of plant materials (500 g) were powdered and submitted for 2 h to hydrodistillation using a Clevenger-type apparatus. The oil was dried over anhydrous sodium sulphate and after filtration, stored at +4 °C prior to GC and GC/MS analysis.

### **Gas Chromatography and Gas Chromatography-Mass Spectrometry Analysis:**

Samples were analyzed on a 7890/7000B GC-MS/MS triple quadrupole system (Agilent Technologies, USA, equipped with a Combi PAL auto sampler) operating in MS1 scan mode, on Agilent HP-5 MS column (30 m×0.25 mm i.d.×0.25 µm film thickness). The GC conditions were: He as carrier gas at a flow rate of 1.0 mL/min, GC oven temperature was kept at 45°C for 2.25 min and programmed to 290°C at a rate of 4°C/min, split ratio was adjusted at 40:1, injection volume 1 µL. Post run: back flash for 1.89 min, at 280°C, with helium pressure of 50 psi. The injector temperature was set at 230°C. Ionization mode was electronic impact at 70 eV. Mass range was set from 40 to 440 Da.

For GC/FID analysis, the same GC parameters were applied as described for GC/MS. FID detector temperature was 300°C. The percentage amounts of the separated compounds were calculated from the GC peak areas using the normalization method without correction factors.

For **static headspace experiment**, 500 mg of milled dry plant material was put into a 20 mL HS vial and soaked with 2 mL of distilled water. The sample was heated at 80°C for 20 minutes. 500 µL of generated vapor was drawn out from the vial using a gas-tight syringe (90°C) and injected directly in the chromatographic column.

### **Identification of Components:**

Oil constituents were identified by comparison of their linear retention indices (relative to C<sub>8</sub>-C<sub>20</sub> and C<sub>21</sub>-C<sub>44</sub> alkanes (Van den Dool and Kratz 1963, Adams 2007) on the HP-5MS column) with literature values and their MS with those of authentic standards, as well as those from Wiley 6, NIST11, Agilent Mass Hunter Workstation B.06.00 software (Stein 1990) and a homemade MS library with the spectra corresponding to pure substances and components of known essential oils by the application of the AMDIS software (Automated Mass Spectral Deconvolution and Identification System, Ver. 2.1, DTRA-NIST, 2011).

**Antioxidant activity assays:** Total phenolic content (TPC) and antioxidant activity of the examined essential oil was determined according to the DPPH, ABTS, CUPRAC, FRAP and TRP methods previously described (Dimitrijevic et al. 2015). All determinations were performed in triplicate.

Table S1: Chemical composition (%) of *Inula oculus-christi* L. essential oil and headspace volatiles (HS)

| RA    | RI   | Compound                                | Essential oil | HS          | Id           |
|-------|------|-----------------------------------------|---------------|-------------|--------------|
| 778*  | 776  | Hexanal                                 | -             | 3.3         | a,b          |
| 841   | 832  | ( <i>E</i> )-2-Hexenal                  | 0.2           | -           | a,b          |
| 932   | 930  | $\alpha$ -Pinene                        | tr            | 0.7         | a,b,c        |
| 953   | 949  | Thuja-2,4(10)-diene                     | tr            | -           | a,b          |
| 959   | 955  | Benzaldehyde                            | tr            | -           | a,b          |
| 976   | 969  | Sabinene                                | tr            | -           | a,b,c        |
| 980   | 973  | $\beta$ -Pinene                         | tr            | 0.5         | a,b,c        |
| 978   | 975  | 1-Octen-3-ol                            | tr            | -           | a,b          |
| 985   | 982  | 6-Methyl-5-heptene-2-one                | tr            | -           | a,b          |
| 988   | 987  | dehydro-1,8-Cineole                     | tr            | 0.4         | a,b          |
| 1003* | 999  | Octanal                                 | tr            | -           | a,b          |
| 1005  | 1001 | $\alpha$ -Phellandrene                  | tr            | -           | a,b          |
| 1009* | 1007 | 2,4-( <i>E,E</i> )-Heptadienal          | tr            | -           | a,b          |
| 1018  | 1014 | $\alpha$ -Terpinene                     | tr            | 1.4         | a,b          |
| 1022  | 1022 | <i>o</i> -Cymene                        | 0.3           | 1.1         | a,b          |
| 1032  | 1028 | <b>Eucalyptol</b>                       | <b>7.3</b>    | <b>87.4</b> | <b>a,b,c</b> |
| 1043* | 1040 | Benzeneacetaldehyde                     | 0.5           | -           | a,b          |
| 1050  | 1045 | $\beta$ - <i>trans</i> -Ocimene         | tr            | -           | a,b          |
| 1062  | 1057 | $\gamma$ -Terpinene                     | 0.7           | 2.3         | a,b          |
| 1068  | 1064 | <i>cis</i> -Sabinene hydrate            | tr            | -           | a,b          |
| 1074  | 1070 | <i>cis</i> -Linalool oxide(furanoid)    | tr            | -           | a,b          |
| 1084  | 1085 | <i>trans</i> -Linalool oxide (furanoid) | 0.3           | -           | a,b          |
| 1098  | 1097 | Linalool                                | 1.6           | -           | a,b,c        |
| 1100  | 1101 | Nonanal                                 | 0.3           | -           | a,b          |
| 1112  | 1114 | <i>trans</i> -Thujone                   | tr            | -           | a,b          |
| 1121  | 1119 | <i>cis-p</i> -Menth-2-en-1-ol           | tr            | -           | a,b          |
| 1140  | 1139 | <i>cis</i> -Sabinol                     | 2.4           | -           | a,b          |
| 1140  | 1143 | <i>cis</i> -Verbenol                    | 0.5           | 0.9         | a,b          |
| 1152* | 1154 | Albene                                  | 0.3           | -           | a,b          |
| 1162  | 1157 | ( <i>E</i> )-2-Nonenal                  | tr            | -           | a,b          |
| 1162  | 1165 | $\delta$ -Terpineol                     | 0.5           | -           | a,b          |
| 1177  | 1176 | Terpinen-4-ol                           | 3.1           | 1.4         | a,b,c        |
| 1183  | 1184 | <i>p</i> -Cymen-8-ol                    | tr            | -           | a,b          |
| 1189  | 1189 | $\alpha$ -Terpineol                     | 3.8           | 0.6         | a,b          |
| 1195  | 1196 | Myrtenol                                | 0.7           | -           | a,b          |
| 1201  | 1203 | Decanal                                 | tr            | -           | a,b          |
| 1205  | 1207 | <i>trans</i> -Piperitol                 | tr            | -           | a,b          |
| 1255  | 1253 | Geraniol                                | 0.5           | -           | a,b          |
| 1290  | 1292 | Thymol                                  | 0.5           | -           | a,b          |

|       |      |                                           |            |    |              |
|-------|------|-------------------------------------------|------------|----|--------------|
| 1326  | 1325 | Silphiperfol-5-ene                        | 0.3        | -  | a,b          |
| 1334  | 1333 | Presilphiperfol-7-ene                     | 0.5        | -  | a,b          |
| 1345  | 1344 | 7- <i>epi</i> -Silphiperfol-5-ene         | 1.0        | -  | a,b          |
| 1358  | 1357 | Silphiperfol-4,7(14)-diene                | 0.3        | -  | a,b          |
| 1377  | 1376 | Silphiperfol-6-ene                        | 1.3        | -  | a,b          |
| 1384* | 1384 | <i>trans</i> - $\beta$ -Damascenone       | 0.3        | -  | a,b          |
| 1384  | 1386 | $\beta$ -Bourbonene                       | 0.6        | -  | a,b          |
| 1405  | 1404 | Italicene                                 | 0.3        | -  | a,b          |
| 1424  | 1421 | 2,5-dimethoxy- <i>p</i> -Cymene           | 3.6        | -  | a,b          |
| 1418  | 1421 | <i>trans</i> -Caryophyllene               | -          | tr | a,b,c        |
| 1430  | 1430 | $\beta$ -Copaene                          | tr         | -  | a,b          |
| 1455* | 1451 | Geranylacetone                            | 0.3        | -  | a,b          |
| 1455  | 1454 | $\alpha$ -Humulene                        | 0.5        | -  | a,b          |
| 1477  | 1477 | $\gamma$ -Muurolene                       | 0.4        | -  | a,b          |
| 1483  | 1482 | $\alpha$ -Curcumene (ar)                  | 3.8        | -  | a,b          |
| 1493  | 1496 | <i>epi</i> -Cubebol                       | 0.5        | -  | a,b          |
| 1500  | 1500 | $\alpha$ -Muurolene                       | 0.6        | -  | a,b          |
| 1515* | 1511 | Nerylisobutyrate                          | 0.3        | -  | a,b          |
| 1513  | 1515 | $\gamma$ -Cadinene                        | 1.3        | -  | a,b          |
| 1518  | 1518 | endo-1-Bourbonanol                        | 0.7        | -  | a,b          |
| 1522  | 1524 | $\delta$ -Cadinene                        | 3.4        | -  | a,b          |
| 1542* | 1540 | Selina-3,7(11)-diene                      | 1.3        | -  | a,b          |
| 1542  | 1544 | $\alpha$ -Calacorene                      | 0.2        | -  | a,b          |
| 1549  | 1551 | Elemol                                    | 0.6        | -  | a,b          |
| 1551* | 1554 | 7- <i>epi-cis</i> -Sesquisabinene hydrate | 0.2        | -  | a,b          |
| 1562  | 1560 | Longicamphenylone                         | 0.3        | -  | a,b          |
| 1564  | 1564 | $\beta$ -Calacorene                       | tr         | -  | a,b          |
| 1570  | 1570 | <i>cis</i> -3-Hexenyl benzoate            | tr         | -  | a,b          |
| 1575  | 1576 | Prenopsan-8-ol                            | 1.0        | -  | a,b          |
| 1576  | 1580 | Spathulenol                               | 0.4        | -  | a,b          |
| 1582  | 1585 | <b>(-)-Caryophyllene oxide</b>            | <b>9.8</b> | -  | <b>a,b,c</b> |
| 1600* | 1601 | Cyperol                                   | 0.6        | -  | a,b          |
| 1610  | 1611 | Humulenepoxide                            | 1.0        | -  | a,b          |
| 1618  | 1617 | <b><i>trans</i>-Longipinocarveol</b>      | <b>9.2</b> | -  | a,b          |
| 1630  | 1630 | Muurola-4,10(14)-dien-1 $\beta$ -ol       | 1.5        | -  | a,b          |
| 1640  | 1643 | T-Cadinol                                 | 3.5        | -  | a,b          |
| 1644  | 1648 | $\delta$ -Cadinol                         | 0.3        | -  | a,b          |
| 1649  | 1653 | $\beta$ -Eudesmol                         | 0.9        | -  | a,b          |
| 1652  | 1657 | $\alpha$ -Cadinol                         | 2.0        | -  | a,b          |
| 1665  | 1663 | <b>Intermedeol</b>                        | <b>6.2</b> | -  | a,b          |
| 1676  | 1675 | Guaia-3,10(14)-dien-11-ol                 | 0.6        | -  | a,b          |
| 1685  | 1684 | $\alpha$ -Bisabolol                       | 0.6        | -  | a,b          |

|                         |      |                                    |             |             |     |
|-------------------------|------|------------------------------------|-------------|-------------|-----|
| 1685                    | 1690 | Eudesma-4(15),7-dien-1 $\beta$ -ol | 1.0         | -           | a,b |
| 1695                    | 1694 | Cyperotundone                      | 1.1         | -           | a,b |
| 1715*                   | 1711 | Pentadecanal                       | 0.3         | -           | a,b |
| 1718                    | 1722 | (Z,E)-2,6-Farnesol                 | 0.8         | -           | a,b |
| 1762                    | 1758 | $\beta$ -Acoradienol               | 1.1         | -           | a,b |
| 1789                    | 1789 | $\beta$ -Bisabolenol               | 0.8         | -           | a,b |
| 1843*                   | 1842 | Hexahydrofarnesyl acetone          | 1.8         | -           | a,b |
| 2114                    | 2114 | Phytol                             | 0.4         | -           | a,b |
| 2300                    | 2295 | Tricosane                          | 0.3         | -           | a,b |
| 2400                    | 2395 | Tetracosane                        | tr          | -           | a,b |
| 2500                    | 2494 | Pentacosane                        | 1.7         | -           | a,b |
| 2700                    | 2694 | Heptacosane                        | 0.2         | -           | a,b |
| <b>Total</b>            |      |                                    | <b>92.7</b> | <b>100</b>  |     |
| <b>Monoterpenoids</b>   |      |                                    | <b>26.4</b> | <b>96.7</b> |     |
| Hydrocarbons (M)        |      |                                    | 1.3         | 6.0         |     |
| Oxygenated (MO)         |      |                                    | 25.1        | 90.7        |     |
| <b>Sesquiterpenoids</b> |      |                                    | <b>61.8</b> |             |     |
| Hydrocarbons (S)        |      |                                    | 15.3        |             |     |
| Oxygenated (SO)         |      |                                    | 46.5        |             |     |
| <b>Diterpene</b>        |      |                                    | <b>0.4</b>  |             |     |
| Hydrocarbons (D)        |      |                                    | 0.4         |             |     |
| <b>Others (O)</b>       |      |                                    | <b>4.1</b>  | <b>3.3</b>  |     |

Compounds are listed in order of elution on a HP-5MS column; RA: Adams retention indices; RI: Experimental retention indices relative to C<sub>8</sub>-C<sub>32</sub> n-alkanes; (\*): NIST Chemistry Web Book Retention indices; tr: traces (<0.1%); -: not detected; a: constituent identified by mass spectral comparison; b: constituent identified by retention index matching; c: constituent identity confirmed by co-injection of an authentic sample.

## References

- Adams RP. 2007. Identification of essential oil components by gas chromatography-mass spectroscopy. Allured Publishing Corporation, Carol Stream, Illinois.
- Gajić M. 1975. *Inula* L. In: Josifović M (Ed). Flora SR Srbije VII [Flora of SR Serbia VII]. Serbian Academy of Sciences and Arts, Belgrade, Serbia; p. 46-59.
- Dimitrijevic M, Stankov Jovanovic V, Cvetkovic J, Mihajilov-Krstev T, Stojanovic G, Mitic V. 2015. Screening of antioxidant, antimicrobial and antiradical activities of twelve selected Serbian wild mushrooms. Anal Method. 7:4181-4191.
- National Institute of Standards and Technology 2005. NIST Chemistry WebBook, Nist Standard Reference database Website. <http://webbook.nist.gov/chemistry/>.
- Stein SE. 1990. National Institute of Standards and Technology (NIST) Mass Spectral Database and Software, Version 3.02.
- Van den Dool H, Kratz PD. 1963. A generalization of the retention index system including linear temperature programmed gas-liquid partition chromatography. J Chromatogr A. 11:463-471.
